# Supplementary material for: Monitoring the Aroma Compound Profiles in the Microbial Fermentation of Seaweeds and Their Effects on Sensory Perception
Source: MDPI journal article supplement (doi:10.3390/fermentation9020135), 2023-01-31
Supplement: s1 [file s1]

Archive with 1 entries (1 files):
- fermentation-2153101-supplementary.pdf
