# Supplementary material for: Monitoring the Aroma Compound Profiles in the Microbial Fermentation of Seaweeds and Their Effects on Sensory Perception
Source: MDPI journal article supplement (doi:10.3390/fermentation9020135), 2023-01-31
Supplement: s1 [file s1 › fermentation-2153101-supplementary.pdf]

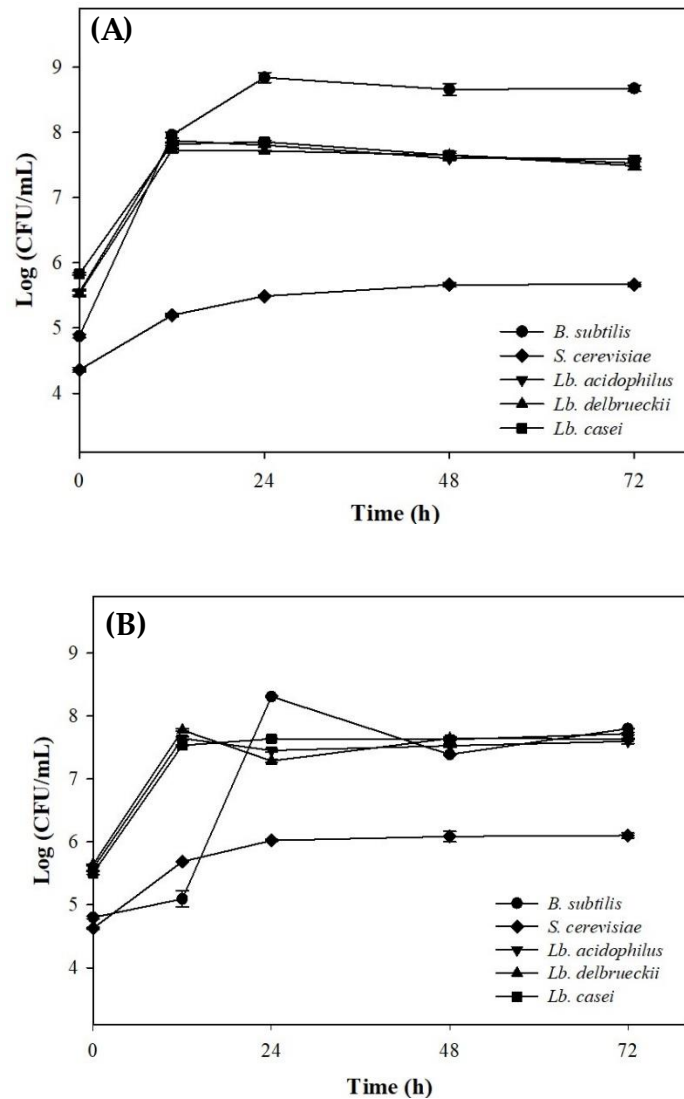

**Supplementary Figure S1. The viable cell counts of various microbial strains in (A) green seaweed *Ulva* sp. and (B) brown seaweed *Laminaria* sp. during fermentation.** The viable cell count was measured at 0, 12, 24, 48, and 72 h. Data are expressed as mean  $\pm$  SD (n = 3).
